# Supplementary material
Source: HighWire-hosted journal article supplement (https://bmjopen.bmj.com/content/12/2/e052832)
Supplement: inline-supplementary-material-2 [file inline-supplementary-material-2.pdf]

| Database     | Search strategy                                                                                                                                                                                                                                                                                                                                                                                                                                                                                                                                                                                                                                                                                                                                                                                                            |
|--------------|----------------------------------------------------------------------------------------------------------------------------------------------------------------------------------------------------------------------------------------------------------------------------------------------------------------------------------------------------------------------------------------------------------------------------------------------------------------------------------------------------------------------------------------------------------------------------------------------------------------------------------------------------------------------------------------------------------------------------------------------------------------------------------------------------------------------------|
| Ovid Medline | <ol style="list-style-type: none"> <li>1. health check*.tw.</li> <li>2. (diabetes adj3 screen*).tw.</li> <li>3. (cardiovascular adj3 screen*).tw.</li> <li>4. (population adj2 screen*).tw.</li> <li>5. (risk factor adj3 screen*).tw.</li> <li>6. (opportunistic adj3 screen*).tw.</li> <li>7. medical check*.tw.</li> <li>8. general check*.tw.</li> <li>9. periodic health exam*.tw.</li> <li>10. annual exam*.tw.</li> <li>11. annual review*.tw.</li> <li>12. NHSHC.tw.</li> <li>13. 1 or 2 or 3 or 4 or 5 or 6 or 7 or 8 or 9 or 10 or 11 or 12</li> <li>14. cardiovascular adj3 prevention.tw.</li> <li>15. (primary care or general practice or primary healthcare).tw</li> <li>16. 14 and 15</li> <li>17. Cardiovascular Diseases/ AND Primary Prevention/</li> <li>18. 16 or 17</li> <li>19. 13 or 18</li> </ol> |
| PubMed       | <ol style="list-style-type: none"> <li>1. health check*</li> <li>2. diabetes screen*</li> <li>3. cardiovascular screen*</li> <li>4. population screen*</li> <li>5. risk factor screen*</li> <li>6. opportunistic screen*</li> <li>7. medical check*</li> <li>8. general check*</li> <li>9. periodic health exam*</li> <li>10. annual exam*</li> <li>11. annual review*</li> <li>12. NHSHC</li> <li>13. 1 or 2 or 3 or 4 or 5 or 6 or 7 or 8 or 9 or 10 or 11 or 12</li> <li>14. Cardiovascular Diseases AND Primary Prevention[MeSH Terms]</li> <li>15. "primary care"[Text Word] OR "general practice"[Text Word] OR "primary healthcare"[Text Word]</li> <li>16. (cardiovascular[Text Word] AND prevention[Text Word])</li> <li>17. #15 and #16</li> <li>18. #14 or #17</li> <li>19. #13 or #18</li> </ol>               |
| Ovid Embase  | <ol style="list-style-type: none"> <li>1. health check*.tw.</li> <li>2. (diabetes adj3 screen*).tw.</li> <li>3. (cardiovascular adj3 screen*).tw.</li> <li>4. (population adj2 screen*).tw.</li> </ol>                                                                                                                                                                                                                                                                                                                                                                                                                                                                                                                                                                                                                     |

|              |                                                                                                                                                                                                                                                                                                                                                                                                                                                                                                                                                                                                                                                                                                                               |
|--------------|-------------------------------------------------------------------------------------------------------------------------------------------------------------------------------------------------------------------------------------------------------------------------------------------------------------------------------------------------------------------------------------------------------------------------------------------------------------------------------------------------------------------------------------------------------------------------------------------------------------------------------------------------------------------------------------------------------------------------------|
|              | <p>5. (risk factor adj3 screen*).tw.<br/>         6. (opportunistic adj3 screen*).tw.<br/>         7. medical check*.tw.<br/>         8. general check*.tw.<br/>         9. periodic health exam*.tw.<br/>         10. annual exam*.tw.<br/>         11. annual review*.tw.<br/>         12. NHSHC.tw.<br/>         13. periodic medical examination/<br/>         14. 1 or 2 or 3 or 4 or 5 or 6 or 7 or 8 or 9 or 10 or 11 or 12 or 13<br/>         15. cardiovascular adj3 prevention.tw.<br/>         16. (primary care or general practice or primary healthcare).tw<br/>         17. 15 and 16<br/>         18. cardiovascular disease/ AND primary prevention/<br/>         19. 17 or 18<br/>         20. 14 or 19</p> |
| Ovid HMIC    | <p>1 "health check*".af.<br/>         2 health checks/<br/>         3 (cardiovascular or vascular or heart or diabetes or stroke).af.<br/>         4 (screen* or risk).af.<br/>         5 3 AND 4<br/>         6 1 OR 2 or 5<br/>         7 cardiovascular adj3 prevention.tw.<br/>         8 (primary care or general practice or primary healthcare).tw<br/>         9 7 and 8<br/>         10 Cardiovascular diseases/ AND exp preventive medicine/<br/>         11 9 or 10<br/>         12 6 or 11</p>                                                                                                                                                                                                                    |
| EBSCO CINAHL | <p>S10 S1 OR S2 OR S9<br/>         S9 S5 OR S8<br/>         S8 S6 AND S7<br/>         S7 (MH "Preventive Health Care+")<br/>         S6 (MH "Cardiovascular Diseases+")<br/>         S5 S3 AND S4<br/>         S4 "primary care" or "general practice" or "primary healthcare"<br/>         S3 TX cardiovascular N3 prevention<br/>         S2 (diabetes N3 screen*) OR (cardiovascular N3 screen*) OR<br/>         (population N2 screen*) OR (risk factor N3 screen*) OR (opportunistic<br/>         N3 screen*) OR "medical check*" OR "general check*" OR "periodic health exam*" OR "annual exam*" OR "annual review*" OR NHSHC</p>                                                                                      |

|                                        |                                                                                                                                                                                                                                                                                                                                                                                                                                                                                                                                                                           |
|----------------------------------------|---------------------------------------------------------------------------------------------------------------------------------------------------------------------------------------------------------------------------------------------------------------------------------------------------------------------------------------------------------------------------------------------------------------------------------------------------------------------------------------------------------------------------------------------------------------------------|
|                                        | S1 health check*                                                                                                                                                                                                                                                                                                                                                                                                                                                                                                                                                          |
| EBSCO Global Health                    | S10 S6 OR S19 OR S3 Limiters - Publication Year: 2016<br>S9 S7 AND S8<br>S8 DE "preventive medicine"<br>S7 DE "cardiovascular diseases"<br>S6 S4 AND<br>S5 S5 "primary care" or "general practice" or "primary healthcare"<br>S4 TX cardiovascular N3 prevention<br>S3 S1 OR S2 131<br>S2 (diabetes N3 screen*) OR (cardiovascular N3 screen*) OR (population N2 screen*) OR (risk factor N3 screen*) OR (opportunistic N3 screen*) OR "medical check*" OR "general check*" OR "periodic health exam*" OR "annual exam*" OR "annual review*" OR NHSHC<br>S1 health check* |
| HDAS PsycInfo                          | 1 "health check*".af.<br>2 PHYSICAL EXAMINATION/<br>3 HEALTH SCREENING/<br>4 "diabetes screen*".af<br>5 "cardiovascular screen*".af<br>6 "population screen*".af<br>7 ("opportunistic* screen*" OR "risk factor screen*").af<br>8 ("medical check*" OR "general check*" OR "periodic health exam*" OR "annual exam*" OR "annual review*" OR NHSHC).af<br>9 1 OR 2 OR 3 OR 4 OR 5 OR 6 OR 7 OR 8<br>10 cardiovascular.ti,ab<br>11 prevention.ti,ab<br>12 10 AND 11<br>13 CARDIOVASCULAR DISORDERS/<br>14 PREVENTIVE MEDICINE/<br>15 13 AND 14 16 12 OR 15 17 9 OR 16       |
| Web of Science, Science Citation Index | "health check*" OR "diabetes screen*" OR "cardiovascular screen*" OR "population screen*" OR "risk factor screen*" OR "Opportunistic screen*" OR "medical check*" OR "general check*" OR "periodic health exam*" OR "annual exam*" OR "annual review*" OR NHSHC OR (Cardiovascular NEAR/3 prevention) AND ("primary care" OR "general practice" OR "primary healthcare") Limit to: England, Scotland, Wales, North Ireland                                                                                                                                                |
| Cochrane Library (Wiley)               | #1 "health check*" #2 (diabetes next/3 screen*) or (cardiovascular next/3 screen*) or (population next/2 screen*) or (opportunistic next/2 screen*) or ("risk factor" next/3                                                                                                                                                                                                                                                                                                                                                                                              |

|                                         |                                                                                                                                                                                                                                                                                                                                                                                                                  |
|-----------------------------------------|------------------------------------------------------------------------------------------------------------------------------------------------------------------------------------------------------------------------------------------------------------------------------------------------------------------------------------------------------------------------------------------------------------------|
|                                         | screen*) or "medical check*" or "general check*" or "periodic health exam*" or "annual exam*" or "annual review*" or NHSHC #3 cardiovascular adj3 prevention.tw. #4 (primary care or general practice or primary healthcare).tw #5 #3 and #4 #6 MeSH descriptor: [Cardiovascular Diseases] this term only #7 MeSH descriptor: [Primary Prevention] explode all trees #8 #6 and #7 #9 #5 or #8 #10 #1 or #2 or #9 |
| NHS Evidence                            | "health check*" OR cardiovascular prevention primary care                                                                                                                                                                                                                                                                                                                                                        |
| TRIP database                           | "health check*" OR cardiovascular prevention primary care                                                                                                                                                                                                                                                                                                                                                        |
| Google Scholar                          | "nhs health check" cardiovascular "health check" cardiovascular prevention "primary care"                                                                                                                                                                                                                                                                                                                        |
| Google                                  | "nhs health check" cardiovascular prevention "primary care" cardiovascular "health check"                                                                                                                                                                                                                                                                                                                        |
| Clinical trials.gov and ISRCTN registry | "health check"                                                                                                                                                                                                                                                                                                                                                                                                   |
