# Supplementary material
Source: HighWire-hosted journal article supplement (https://bmjopen.bmj.com/content/12/2/e052832)
Supplement: inline-supplementary-material-3 [file inline-supplementary-material-3.pdf]

## **PHE NHS health checks inclusion/exclusion criteria**

### **Study Type Inclusion Criteria**

All studies must have included the NHS Health Check. Primary studies and guidelines will be included. Primary studies should have one of the following designs:

- RCT or cluster RCT
- Quasi RCT or cluster quasi RCT
- Controlled and uncontrolled pre- post-studies with appropriate comparator groups
- Interrupted time series
- Cohort studies (prospective and retrospective)
- Case-control studies
- Qualitative studies from any discipline or theoretical tradition using recognised qualitative methods of data collection and analysis
- Economic and health outcome modelling

### **Study Type Exclusion Criteria**

Editorials, commentaries and opinion pieces will be excluded

Table of inclusion and exclusion characteristics for each objective.

| Objective number                     | One                                                                                                        | Two                                                                                                                                                                                                                | Three                                                                                                                         | Four                                                                                                                                                                                                                        | Five                                                         | Six                                                                                                                                                                                                                                                                                                                                                                                                         |
|--------------------------------------|------------------------------------------------------------------------------------------------------------|--------------------------------------------------------------------------------------------------------------------------------------------------------------------------------------------------------------------|-------------------------------------------------------------------------------------------------------------------------------|-----------------------------------------------------------------------------------------------------------------------------------------------------------------------------------------------------------------------------|--------------------------------------------------------------|-------------------------------------------------------------------------------------------------------------------------------------------------------------------------------------------------------------------------------------------------------------------------------------------------------------------------------------------------------------------------------------------------------------|
| Question                             | Who is and who is not having an NHS health check                                                           | What factors increase take up among population and sub-groups                                                                                                                                                      | Why do people not take up an offer of an NHS health check                                                                     | How is primary care managing people identified as being at risk of CVD or with abnormal risk factor results                                                                                                                 | What are patients’ experiences of having an NHS health check | What is the effect of the NHS health check on disease detection, changing behaviours, referrals to local risk management services, reductions in individual risk factor prevalence, reducing CVD risk and on statin and antihypertensive prescribing                                                                                                                                                        |
| Research type                        | Quantitative                                                                                               | Qualitative/Quantitative                                                                                                                                                                                           | Qualitative                                                                                                                   | Qualitative/Quantitative                                                                                                                                                                                                    | Qualitative                                                  | Quantitative                                                                                                                                                                                                                                                                                                                                                                                                |
| Included participants                | UK population eligible for NHS health checks (aged 40-74yrs)                                               | UK population invited for NHS health checks                                                                                                                                                                        | UK population eligible but not attending health checks                                                                        | Primary care services across the UK providing health checks                                                                                                                                                                 | UK population attending health checks                        | UK population eligible for NHS health checks                                                                                                                                                                                                                                                                                                                                                                |
| Included measurements for extraction | Demographics, patient condition characteristics (e.g. BMI, smoking status, CVD risk factors, etc)          | Patient characteristics (subgroups, protected characteristics), setting characteristics (any health care), mode of delivery, booking system, cell/recall methods, take up rates, use of point of care testing, etc | Patient opinions, attitudes and experiences of health checks, choices made and why, reasons and beliefs underlying decisions. | Provider management protocols, recall methods, provider experiences of programme provision, referrals to lifestyle services, prescribing statins or anti-hypertensives, further investigations, adherence to guidelines etc | Patient opinions and experiences of health checks            | Disease and condition detection rates, including hypertension, diabetes, chronic kidney disease, AF, familial hypercholesterolemia, peripheral vascular disease etc, behaviour change, referrals to local risk management services, reductions in individual risk factor prevalence or CVD risk, statin and anti-hypertensive prescribing, any other physical or mental health outcomes, cost effectiveness |
| Exclusions                           | Participants not eligible for health checks or receiving other forms of health check or screening services | Patients not eligible for health checks or taking up other forms of health check or screening services                                                                                                             | Patients not eligible for health check or choosing not to take up other forms of health check or screening services           | Primary care services not offering NHS health checks or people identified as at risk for CVD outside NHS health checks                                                                                                      | Patients who have not had an NHS health check                | Patients not eligible for an NHS health check                                                                                                                                                                                                                                                                                                                                                               |
