# Supplementary material
Source: HighWire-hosted journal article supplement (https://bmjopen.bmj.com/content/12/2/e052832)
Supplement: inline-supplementary-material-5 [file inline-supplementary-material-5.pdf]

**Table 1. Objective 1: Are there differences in demographic factors of those attending and not attending an NHS Health Check?**

| Nº of studies | Study design                       | Risk of bias             | Inconsistency            | Indirectness | Imprecision              | Other considerations | Certainty   | Importance |
|---------------|------------------------------------|--------------------------|--------------------------|--------------|--------------------------|----------------------|-------------|------------|
| 29            | observational studies <sup>a</sup> | not serious <sup>b</sup> | not serious <sup>c</sup> | not serious  | not serious <sup>d</sup> | none                 | ⊕⊕○○<br>LOW | IMPORTANT  |

- a. One study had a quasi-experimental design, the others were observational studies of various designs.
- b. A significant proportion of the studies were rated low for baseline imbalances between groups and lack of control for confounding, however the purpose of this question was to assess variations in NHS Health Check attendance versus non-attendance between population sub-groups in relation to social characteristics, therefore imbalances in characteristics between the intervention and control groups were expected and these are likely to reflect reality.
- c. Overall the results indicate that older persons and females were most likely to attend an NHS Health check. The results were less consistent in relation to ethnicity. Results tended to vary according to the sample size and geographic coverage of each study. Studies also varied in relation to setting and the cardiovascular risk profile of participants, therefore inconsistencies were not unexplained.
- d. The overall sample size is large.

**References:**

1. Artac M, Dalton AR, Babu H, et al. Primary care and population factors associated with NHS Health Check coverage: a national cross-sectional study. *Journal of public health* (Oxford, England) 2013;35(3):431-9.
2. Artac M, Dalton AR, Majeed A, et al. Uptake of the NHS Health Check programme in an urban setting. *Fam Pract* 2013;30(4):426-35.
3. Attwood S, Morton K, Sutton S. Exploring equity in uptake of the NHS Health Check and a nested physical activity intervention trial. *Journal of public health* (Oxford, England) 2016;38(3):560-68.
4. Baker C, Loughren EA, Crone D, et al. A process evaluation of the NHS Health Check care pathway in a primary care setting. *Journal of public health* (Oxford, England) 2015;37(2):202-9.
5. Carter P, Bodicoat DH, Davies MJ, et al. A retrospective evaluation of the NHS Health Check Programme in a multi-ethnic population. *Journal of public health* (Oxford, England) 2016;38(3):534-42.
6. Chang KC, Soljak M, Lee JT, et al. Coverage of a national cardiovascular risk assessment and management programme (NHS Health Check): Retrospective database study. *Prev Med* 2015;78:1-8.
7. Chang KC, Lee JT, Vamos EP, et al. Impact of the National Health Service Health Check on cardiovascular disease risk: a difference-in-differences matching analysis. *CMAJ* 2016;188(10):E228-E38.

8. Chattopadhyay K, Biswas M, Moore R. NHS Health Check and healthy lifestyle in Leicester, England: analysis of a survey dataset. *Perspect Public Health* 2020;140(1):27-37.
9. Cochrane T, Gidlow CJ, Kumar J, et al. Cross-sectional review of the response and treatment uptake from the NHS Health Checks programme in Stoke on Trent. *Journal of public health (Oxford, England)* 2013;35(1):92-8.
10. Coffey M, Cooper AM, Brown TM. *Vascular Health Checks in Salford: An Exploration Using FARSITE Data, Commissioned by Salford City Council* 2014
11. Coghill N, Garside L, Montgomery AA, et al. NHS health checks: a cross-sectional observational study on equity of uptake and outcomes. *BMC health services research* 2018;18(1):238.
12. Cook EJ, Sharp C, Randhawa G, et al. Who uses NHS health checks? Investigating the impact of ethnicity and gender and method of invitation on uptake of NHS health checks. *Int J Equity Health* 2016;15:13.
13. Corlett SA, Krska J. Evaluation of NHS Health Checks provided by community pharmacies. *Journal of Public Health*. Dec;38(4):E516-E23.
14. Dalton AR, Bottle A, Okoro C, et al. Uptake of the NHS Health Checks programme in a deprived, culturally diverse setting: cross-sectional study. *Journal of public health (Oxford, England)* 2011;33(3):422-9.
15. Forster AS, Burgess C, Dodhia H, et al. Do health checks improve risk factor detection in primary care? Matched cohort study using electronic health records. *Journal of Public Health* 2015;38(3):552-59.
16. Krska J, du Plessis R, Chellaswamy H. Implementation of NHS Health Checks in general practice: variation in delivery between practices and practitioners. *Prim Health Care Res Dev* 2016;17(4):385-92.
17. Kumar J, Chambers R, Mawby Y, et al. Delivering more with less? Making the NHS Health Check work in financially hard times: real time learning from Stoke-on-Trent. *Qual Prim Care* 2011;19(3):193-9.
18. Local Government Authority. Checking the health of the nation: Implementing the NHS Health Check Programme Studies - Buckinghamshire, 2015.
19. Greenwich N. Evaluation of NHS Health Checks and Community Outreach Programme in Greenwich. 2011:1-61.
20. Roberts DJ, de Souza VC. A venue-based analysis of the reach of a targeted outreach service to deliver opportunistic community NHS Health Checks to 'hard-to-reach' groups. *Public Health* 2016;137:176-81.
21. Robson J, Dostal I, Madurasinghe V, et al. The NHS Health Check programme: implementation in east London 2009-2011. *BMJ Open* 2015;5(4):e007578.
22. Robson J, Dostal I, Sheikh A, et al. The NHS Health Check in England: an evaluation of the first 4 years. *BMJ Open* 2016;6(1):e008840.
23. NHS Digital. NHS Health Check programme, Patients Recorded as Attending and Not Attending, 2012-13 to 2017-18. 2019 Oct 2019.
24. Trivedy C, Vlaev I, Seymour R, et al. An evaluation of opportunistic health checks at cricket matches: the Boundaries for Life initiative. *Sport in Society* 2017;20(2):226-34.
25. Usher-Smith JA, Pritchard J, Poole S, et al. Offering statins to a population attending health checks with a 10-year cardiovascular disease risk between 10% and 20. *Int J Clin Pract* 2015;69(12):1457-64.
26. Visram S, Carr S, Geddes L. Can lay health trainers increase uptake of NHS Health Checks in hard to reach populations? A mixed method pilot evaluation. *J Public Health (Bangkok)* 2015;36:226-33.
27. Worringer M, Cecil E, Watt H. Community providers of the NHS health Check CVD prevention Programme target younger and more deprived people. *Int J Integr Care* 2015;15 doi: 10.5334/ijic.2185
28. Worringer M, Cecil E, Watt H, Chang K, Hamid F, Khunti K, et al. Evaluation of community provision of a preventive cardiovascular programme - the National Health Service Health Check in reaching the under-served groups by primary care in England: cross sectional observational study. *BMC Health Serv Res*. 2017 Jun 14;17(1):405.
29. Lang SJ, Abel GA, Mant J, et al. Impact of socioeconomic deprivation on screening for cardiovascular disease risk in a primary prevention population: a cross-sectional study. *BMJ Open* 2016;6(3):e009984.

Table 2. Objective 2.1: Do socio-demographic factors affect update of the NHS Health Check?

| Nº of studies | Study design                       | Risk of bias             | Inconsistency            | Indirectness | Imprecision              | Other considerations | Certainty   | Importance |
|---------------|------------------------------------|--------------------------|--------------------------|--------------|--------------------------|----------------------|-------------|------------|
| 12            | observational studies <sup>a</sup> | not serious <sup>b</sup> | not serious <sup>c</sup> | not serious  | not serious <sup>d</sup> | none                 | ⊕⊕○○<br>LOW | IMPORTANT  |

- a. One study was a randomized controlled trial, one study had a quasi-randomized design; the remaining studies were non-randomized studies, mainly experimental.
- b. Six (50%) of the studies received a 'low' rating for domains relevant to the risk of bias, however four of these the issues were in relation to baseline imbalances and confounding, however the purpose of this research objective is to identify sociodemographic differences between attendees and non-attendees. Only two of twelve studies received a low rating for domains relevant to the risk of bias (exposure and outcome measurement and blinding). However, in the context of the NHS Health Checks programme, where the intervention is obvious and data are routinely collected and subject to inaccuracies, these issues don't necessarily indicate poor quality research methods were used.
- c. Generally, older persons, females and individuals from least deprived background were most likely to attend NHS Health Checks. The results in relation to ethnic group were mixed. Variations in results across studies are likely to reflect heterogeneity between studies, including different methods and geographical coverage.
- d. The sample size overall, across the included studies was large.

References:

1. Attwood S, Morton K, Sutton S. Exploring equity in uptake of the NHS Health Check and a nested physical activity intervention trial. *Journal of public health (Oxford, England)* 2016;38(3):560-68.
2. Cochrane T, Gidlow CJ, Kumar J, et al. Cross-sectional review of the response and treatment uptake from the NHS Health Checks programme in Stoke on Trent. *Journal of public health (Oxford, England)* 2013;35(1):92-8.
3. Cook EJ, Sharp C, Randhawa G, et al. Who uses NHS health checks? Investigating the impact of ethnicity and gender and method of invitation on uptake of NHS health checks. *Int J Equity Health* 2016;15:13.
4. Dalton AR, Bottle A, Okoro C, et al. Uptake of the NHS Health Checks programme in a deprived, culturally diverse setting: cross-sectional study. *Journal of public health (Oxford, England)* 2011;33(3):422-9.
5. Krska J, du Plessis R, Chellaswamy H. Implementation of NHS Health Checks in general practice: variation in delivery between practices and practitioners. *Prim Health Care Res Dev* 2016;17(4):385-92.
6. Kumar J, Chambers R, Mawby Y, et al. Delivering more with less? Making the NHS Health Check work in financially hard times: real time learning from Stoke-on-Trent. *Qual Prim Care* 2011;19(3):193-9.
7. NHS Greenwich. Evaluation of NHS Health Checks and Community Outreach Programme in Greenwich. 2011:1-61.

8. McDermott L, Cornelius V, Wright AJ, et al. Enhanced Invitations Using the Question-Behavior Effect and Financial Incentives to Promote Health Check Uptake in Primary Care. *Ann Behav Med* 2018;52(7):594-605.
9. Coffee S. Engaging Mental Health Service Users in Solihull with the NHS Health Check Programme: A Community Pilot Project 2015
10. Coghill N, Garside L, Chappell A. A Quantitative Quasi-experimental Approach to the Evaluation of a Telephone Outreach Service. University of Bath 2016
11. Hooper J, Chohan P, Caley M. Case detection of disease by NHS Health Checks in Warwickshire, England and comparison with predicted performance. *Public Health* 2014;128(5):475-7.
12. Sallis A, Bunten A, Bonus A, et al. The effectiveness of an enhanced invitation letter on uptake of National Health Service Health Checks in primary care: a pragmatic quasi-randomised controlled trial. *BMC Fam Pract* 2016;17:35.

Table 3. Objective 2.2: Do variations to the invitation method affect NHS Health Check attendance? Assessment of quantitative evidence

| Nº of studies | Study design                       | Risk of bias         | Inconsistency            | Indirectness | Imprecision              | Other considerations | Certainty        | Importance |
|---------------|------------------------------------|----------------------|--------------------------|--------------|--------------------------|----------------------|------------------|------------|
| 13            | observational studies <sup>a</sup> | serious <sup>b</sup> | not serious <sup>c</sup> | not serious  | not serious <sup>d</sup> | None                 | ⊕○○○<br>VERY LOW | IMPORTANT  |

- a. 6 RCTs; N=2 quasi-randomized trials; the remaining studies used observational designs.
- b. Most (>50%) of studies scored low for one or more domain that could introduce bias into the study results.
- c. The standard national invitation letter was generally associated with reduced uptake compared to variations. The variations differed between studies, therefore differences in relative uptake between groups in each study are expected.
- d. The sample size was large (in the thousands) across studies.

References:

1. Cook EJ, Sharp C, Randhawa G, et al. Who uses NHS health checks? Investigating the impact of ethnicity and gender and method of invitation on uptake of NHS health checks. *Int J Equity Health* 2016;15:13.
2. Kumar J, Chambers R, Mawby Y, et al. Delivering more with less? Making the NHS Health Check work in financially hard times: real time learning from Stoke-on-Trent. *Qual Prim Care* 2011;19(3):193-9.
3. McDermott L, Cornelius V, Wright AJ, et al. Enhanced Invitations Using the Question-Behavior Effect and Financial Incentives to Promote Health Check Uptake in Primary Care. *Ann Behav Med* 2018;52(7):594-605.
4. Sallis A, Buntin A, Bonus A, et al. The effectiveness of an enhanced invitation letter on uptake of National Health Service Health Checks in primary care: a pragmatic quasi-randomised controlled trial. *BMC Fam Pract* 2016;17:35. doi: 10.1186/s12875-016-0426-y [published Online First: 2016/03/25]
5. Coghill N, Garside L, Chappell A. Improving the uptake of NHS Health Checks in more deprived communities using 'outreach telephone calls' made by specialist health advocates from the same communities: A quantitative service evaluation. A conference abstract. *Public Health England NHS Health Check National Conference 2016: Getting Serious about Prevention* 2016
6. Cornelius VR, McDermott L, Forster AS, et al. Automated recruitment and randomisation for an efficient randomised controlled trial in primary care. *Trials* 2018;19(1):341.
7. Gold N, Durlik C, Sanders JG, et al. Applying behavioural science to increase uptake of the NHS Health Check: a randomised controlled trial of gain- and loss-framed messaging in the national patient information leaflet. *BMC Public Health* 2019;19(1):1519.

8. Gulliford MC, Khoshaba B, McDermott L, et al. Cardiovascular risk at health checks performed opportunistically or following an invitation letter. Cohort study. *Journal of public health (Oxford, England)* 2018;40(2):e151-e56.
9. Sallis A, Sherlock J, Bonus A, et al. Pre-notification and reminder SMS text messages with behaviourally informed invitation letters to improve uptake of NHS Health Checks: a factorial randomised controlled trial. *BMC Public Health* 2019;19(1):1162. doi: 10.1186/s12889-019-7476-8
10. McDermott L, Wright A, Cornelius V. Enhanced invitation methods and uptake of health checks in primary care. Rapid randomised controlled trial using electronic health records. *Health Technology Assessment* 2017;20(84)
11. Alpsten BT. Saving lives through effective patient engagement around NHS health checks. *Clin Gov* 2015;20:108-12.
12. Local Government Association. Checking the health of the nation : Implementing the NHS Health Check Programme studies - Stoke-on-Trent. 2015
13. Gidlow CJ, Ellis NJ, Riley V, et al. Randomised controlled trial comparing uptake of NHS Health Check in response to standard letters, risk-personalised letters and telephone invitations. *BMC Public Health* 2019;19(1):224.

**Table 4. Objective 2.2 Do variations to the invitation method affect NHS Health Check attendance? Assessment of qualitative evidence**

| Finding                                                                   | Studies contributing to findings (see report reference list)                                                          | Methodological limitations                                                                                                                                       | Coherence                                                                                                                                 | Adequacy                                                                                                                          | Relevance                                                                                                                                                                           | CERQual assessment of confidence in the evidence | Explanation of CERQUAL assessment                                                                   |
|---------------------------------------------------------------------------|-----------------------------------------------------------------------------------------------------------------------|------------------------------------------------------------------------------------------------------------------------------------------------------------------|-------------------------------------------------------------------------------------------------------------------------------------------|-----------------------------------------------------------------------------------------------------------------------------------|-------------------------------------------------------------------------------------------------------------------------------------------------------------------------------------|--------------------------------------------------|-----------------------------------------------------------------------------------------------------|
| Differing views on opportunistic recruitment depending on setting         | Greenwich <i>et al</i> (2011)<br>Ismail <i>et al</i> (2015)<br>Perry <i>et al</i> (2014)<br>Riley <i>et al</i> (2015) | Most papers were highly rated in terms of quality, with only one being rated overall as medium quality. Two papers scored low in ethical issue and one in rigour | There were no or few concerns identified in any of the papers as they all presented similar data to the findings presented in the review. | Three papers had minor concerns due to not presenting a rich picture of the data gathered. The other had no or few minor concerns | One of the papers had moderate concerns as the quote presented in the review was not clearly linked to the theme and the paper did not otherwise refer to this theme. <sup>51</sup> | Moderate confidence                              | Reduced grade due to moderate concern and minor concerns around ethical issues and richness of data |
| Benefit of community ambassadors, particularly for ethnic minority groups | Riley <i>et al</i> (2015)<br>Stone <i>et al</i> (2019)                                                                | One paper was medium and one high rated, both scored lower in their description of the relationship between researcher and participants.                         | There were no or few concerns identified in either paper in this domain.                                                                  | No or few minor concerns                                                                                                          | No or few minor concerns in either paper                                                                                                                                            | High confidence                                  | No reason to downgrade                                                                              |
| Preference for telephone contact                                          | Stone <i>et al</i> (2019)<br>Strutt <i>et al</i> (2011)<br>Greenwich <i>et al</i> (2011)                              | Greenwich and Stone medium quality overall, Strutt high quality overall                                                                                          | No coherence concerns                                                                                                                     | Moderate concern due to richness of data gathered                                                                                 | No concerns                                                                                                                                                                         | Moderate confidence                              | Reduced grade due to concerns on richness of data                                                   |

Table 5. Objective 2.3 Does GP practice versus alternative setting affect NHS Health Check uptake?

| Nº of studies | Study design          | Risk of bias         | Inconsistency            | Indirectness | Imprecision              | Other considerations | Certainty        | Importance |
|---------------|-----------------------|----------------------|--------------------------|--------------|--------------------------|----------------------|------------------|------------|
| 2             | observational studies | serious <sup>a</sup> | not serious <sup>b</sup> | not serious  | not serious <sup>c</sup> | none                 | ⊕○○○<br>VERY LOW | IMPORTANT  |

- a. Both studies scored low for imbalances in baseline characteristics between groups and confounding.
- b. One study reported higher uptake in GP surgeries whereas the other reported similar attendance between settings. This variation is likely to reflect heterogeneity between studies in relation to the population, mode of invitation and the type of non-GP setting in which the NHS Health Checks were performed.
- c. Overall sample size across the two studies was large (in the thousands)

References:

1. Roberts DJ, de Souza VC. A venue-based analysis of the reach of a targeted outreach service to deliver opportunistic community NHS Health Checks to 'hard-to-reach' groups. *Public Health* 2016;137:176-81.
2. Whittaker PJ. Uptake of cardiovascular health checks in community pharmacy versus general practice. *Journal of Fluid Mechanics* 2020;884:6.



**Table 6. Objective 4 Support for the concept of management of people identified as being at risk of CVD, as an outcome of the NHS Health Checks intervention**  
**Assessment of mixed methods evidence.**

| Domain                  | Assessment of support                                                                                                                                                                                                                                                                                                                                                                                                   | Level of support |
|-------------------------|-------------------------------------------------------------------------------------------------------------------------------------------------------------------------------------------------------------------------------------------------------------------------------------------------------------------------------------------------------------------------------------------------------------------------|------------------|
| Truth value/bias        | Inferences and conclusions were reflected in the quantitative and qualitative data.                                                                                                                                                                                                                                                                                                                                     | Moderate         |
| Explanation credibility | The issues raised by health professionals were sound. There was a lack of exploration of the reasons why service delivery/ implementation/ follow up, between practices.                                                                                                                                                                                                                                                | Moderate         |
| Weakness minimisation   | Data in relation to this concept were collected from quantitative, qualitative and mixed methods although the study designs were homogeneous (quant data collected from cross-sectional surveys; qualitative data collected from free text responses and semi-structured interviews). Consistencies were apparent across different study types in relation to variations in service delivery, referrals and follow ups. | Strong           |
| Inside-outside          | Quantitative and qualitative data were collected, however interview and survey methods may entail responder and reporting biases. Objectivity of these methods is therefore limited.                                                                                                                                                                                                                                    | Low              |
| Publication bias        | Lack of significance testing therefore it is not possible to assess for this criterion                                                                                                                                                                                                                                                                                                                                  | n/a              |
| Additional comments     | None                                                                                                                                                                                                                                                                                                                                                                                                                    | n/a              |
| Overall assessment      | Moderate                                                                                                                                                                                                                                                                                                                                                                                                                |                  |

**References:**

1. Baker C, Loughren EA, Crone D, et al. A process evaluation of the NHS Health Check care pathway in a primary care setting. *Journal of public health (Oxford, England)* 2015;37(2):202-9.
2. Greenwich N. Evaluation of NHS Health Checks and Community Outreach Programme in Greenwich. 2011:1-61.
3. McDermott L, Cornelius V, Wright AJ, et al. Enhanced Invitations Using the Question-Behavior Effect and Financial Incentives to Promote Health Check Uptake in Primary Care. *Ann Behav Med* 2018;52(7):594-605.
4. Ismail H, Atkin K. The NHS Health Check programme: insights from a qualitative study of patients. *Health Expect* 2016;19(2):345-55.
5. Riley R, Coghill N, Montgomery A, et al. The provision of NHS health checks in a community setting: an ethnographic account. *BMC health services research* 2015;15:546. doi: 10.1186/s12913-015-1209-1
6. Alageel S, Gulliford MC. Health checks and cardiovascular risk factor values over six years' follow-up: Matched cohort study using electronic health records in England. *PLoS Med* 2019;16(7):e1002863.
7. Alageel S, Gulliford MC, McDermott L, et al. Implementing multiple health behaviour change interventions for cardiovascular risk reduction in primary care: a qualitative study. *BMC Fam Pract* 2018;19(1):171.
8. Alageel S, Gulliford MC, Wright A, et al. Engagement with advice to reduce cardiovascular risk following a health check programme: A qualitative study. *Health Expect* 2020;23(1):193-201.
9. 69. Ismail H, Kelly S. Lessons learned from England's Health Checks Programme: using qualitative research to identify and share best practice. *BMC Fam Pract* 2015;16:144.
10. Nicholas JM, Burgess C, Dohia H. Variations in the organization and delivery of the 'NHS Health Check' in primary care. *J Public Heal* 2013;35:85-91.
11. Oswald N, McNaughton R, Watson P. Tees Vascular Assessment Programme Evaluation. 2010
12. McNaughton RJ, Oswald NT, Shucksmith JS, et al. Making a success of providing NHS Health Checks in community pharmacies across the Tees Valley: a qualitative study. *BMC health services research* 2011;11:222.
13. Research Works. Public Health England Understanding the implementation of NHS Health Checks. 2013
14. Riley R, Coghill N, Montgomery A, et al. Experiences of patients and healthcare professionals of NHS cardiovascular health checks: a qualitative study. *Journal of public health (Oxford, England)* 2016;38(3):543-51.
15. Shaw RL, Pattison HM, Holland C. Be SMART: examining the experience of implementing the NHS Health Check in UK primary care. *BMC Fam Pract* 2015;16:1.
16. Shaw RL, Lowe H, Holland C, et al. GPs' perspectives on managing the NHS Health Check in primary care: a qualitative evaluation of implementation in one area of England. *BMJ Open* 2016;6(7):e010951.
17. Baker C, Loughren E, Crone D. Perceptions of health professionals involved in a NHS Health Check care pathway. *Pract Nurs* 2015;26:608-12.
18. Crabtree V, Hall J, Gandeche M. NHS Health Checks: The views of community pharmacists and support staff. *Int J Pharm Pract* 2010 2010;18:35-6.
19. Graley CEM, May KF, DC. M. Postcode lotteries in public health - the NHS Health Checks Programme in North West London. *BMC Public Health* 2011;11:738.
20. Krska J, du Plessis R, Chellaswamy H. Views of practice managers and general practitioners on implementing NHS Health Checks. *Prim Health Care Res Dev* 2016;17(2):198-205.
21. Loo RL, Diaper C, Salami OT. The NHS Health Check: The views of community pharmacists. *Int J Pharm Pract* 2011;19:13.

**Table 7. Objective 5 Support for the concept of patient experiences as an outcome of the NHS Health Checks intervention Assessment of mixed methods evidence.**

| <b>Domain</b>                  | <b>Assessment of support</b>                                                                                                                                                                                                                                                                                                                                                                                                                                                                                                                                                                                                                                                                                                                                                                                                                                                  | <b>Level of support</b> |
|--------------------------------|-------------------------------------------------------------------------------------------------------------------------------------------------------------------------------------------------------------------------------------------------------------------------------------------------------------------------------------------------------------------------------------------------------------------------------------------------------------------------------------------------------------------------------------------------------------------------------------------------------------------------------------------------------------------------------------------------------------------------------------------------------------------------------------------------------------------------------------------------------------------------------|-------------------------|
| <b>Truth value/bias</b>        | <p>Inferences and conclusions made by authors were reflected in the quantitative and qualitative data reported. For example, high levels of satisfaction were evident in the results from quantitative survey data, and participant quotes supported the themes derived by authors.</p> <p>The quantitative data presented from satisfaction surveys were based on questions that were perhaps too broad in focusing on general, overall satisfaction. However, the negative aspects of patients' experiences were captured in the qualitative data.</p> <p>It would have been helpful if the studies which used mixed methods had collected numeric data based on the results from the qualitative methods. For example, by quantifying the number/ proportion of patients who issues expressed through the qualitative data (e.g. how many understood their risk score)</p> | Moderate                |
| <b>Explanation credibility</b> | The issues regarding patient experiences of the NHS Health Checks programme that were reflected in quotes are understandable (e.g. patient expectations that a 'Health Check' would entail testing for medical conditions not just affecting the cardiovascular system; lack understanding of the risk score). Some studies lacked exploration of the social and psychological mechanisms relating to the issues that patients experienced. For example, the reasons why many attendees would struggle to interpret the risk score.                                                                                                                                                                                                                                                                                                                                           | Moderate                |
| <b>Weakness minimisation</b>   | Supported across limited quantitative (cross-sectional surveys) and several qualitative designs (free-text survey responses; focus groups and interviews). The quantitative data indicate a high level of patient satisfaction, whereas the data from qualitative studies highlight issues with the NHS Health Checks Programme                                                                                                                                                                                                                                                                                                                                                                                                                                                                                                                                               | Inconsistent support    |
| <b>Inside-outside</b>          | The data covers views and quantitative responses from patients. These methods are all at risk of responder bias and may represent the views of those with particularly strong opinions. Objectivity of these methods is therefore limited.                                                                                                                                                                                                                                                                                                                                                                                                                                                                                                                                                                                                                                    | Low                     |
| <b>Publication bias</b>        | Lack of significance testing therefore it is not possible to assess for this criterion                                                                                                                                                                                                                                                                                                                                                                                                                                                                                                                                                                                                                                                                                                                                                                                        | n/a                     |

|                     |              |     |
|---------------------|--------------|-----|
| Additional comments | None         | n/a |
| Overall assessment  | Low/moderate |     |

References

1. Corlett SA, Krska J. Evaluation of NHS Health Checks provided by community pharmacies. *Journal of public health (Oxford, England)* 2016;38(4):e5 16-e23.
2. Greenwich N. Evaluation of NHS Health Checks and Community Outreach Programme in Greenwich. 2011:1-61.
3. Trivedy C, Vlaev I, Seymour R, et al. An evaluation of opportunistic health checks at cricket matches: the Boundaries for Life initiative. *Sport in Society* 2017;20(2):226-34.
4. Krska J, du Plessis R, Chellaswamy H. Views and experiences of the NHS Health Check provided by general medical practices: cross-sectional survey in high-risk patients. *Journal of public health (Oxford, England)* 2015;37(2):210-7.
5. Ismail H, Atkin K. The NHS Health Check programme: insights from a qualitative study of patients. *Health Expect* 2016;19(2):345-55.
6. Perry C, Thurston M, Alford S. The NHS health check programme in England: a qualitative study. *Health Promot Int* 2014;31:106-15.
7. Riley R, Coghill N, Montgomery A, et al. The provision of NHS health checks in a community setting: an ethnographic account. *BMC health services research* 2015;15:546.
8. Strutt E. Patient-centred care: patients' experiences of and responses to the National Health Service (NHS) Health Check programme in general practice. *PLoS Med* 2019;16(7):e1002863.
9. Alageel S, Gulliford MC, McDermott L, et al. Implementing multiple health behaviour change interventions for cardiovascular risk reduction in primary care: a qualitative study. *BMC Fam Pract* 2018;19(1):171.
10. Alageel S, Gulliford MC, Wright A, et al. Engagement with advice to reduce cardiovascular risk following a health check programme: A qualitative study. *Health Expect* 2020;23(1):193-201.
11. Baker C, Loughren EA, Crone D, et al. Patients' perceptions of a NHS Health Check in the primary care setting. *Qual Prim Care* 2014;22(5):232-7.
12. Oswald N, Mcnaughton R, Watson P. Tees Vascular Assessment Programme Evaluation. 2010
13. Alford S, Catherine P. Knowsley at Heart community NHS health checks: Behaviour change evaluation. 2010
14. Chipchase L, Hill P, Waterall J. An insight into the NHS Health Check Programme in Birmingham; Summar report. 2011
15. Jenkinson CE, Asprey A, Clark CE, et al. Patients' willingness to attend the NHS cardiovascular health checks in primary care: a qualitative interview study. *BMC Fam Pract* 2015;16:33.
16. Research Works. Public Health England Understanding the implementation of NHS Health Checks. 2013
17. Riley R, Coghill N, Montgomery A, et al. Experiences of patients and healthcare professionals of NHS cardiovascular health checks: a qualitative study. *Journal of public health (Oxford, England)* 2016;38(3):543-51.

18. Hawking MKD, Timmis A, Wilkins F, et al. Improving cardiovascular disease risk communication in NHS Health Checks: a qualitative study. *BMJ Open* 2019;9(8):e026058.
19. Alageel S, Gulliford MC. Effect of the NHS Health Check programme on cardiovascular disease risk factors during 6 years' follow-up: matched cohort study. *Lancet* 2018;392:17-17.
20. Cowper. The NHS Health Check Leadership Forum : Summary and Findings. NHS Heal Check Leadersh Forum 2013. NHS Heal Check Leadersh Forum 2013
21. Riding L-E. Public health transformation twenty months on: adding value to tackle local health needs. [http://www.localgovuk/documents/10180/6869714/L15\\_15+Public+health+transformation+twenty+months+on\\_WEB\\_39693pdf/7bb8060e-9a7b-4b85-8099e854be74cfb5](http://www.localgovuk/documents/10180/6869714/L15_15+Public+health+transformation+twenty+months+on_WEB_39693pdf/7bb8060e-9a7b-4b85-8099e854be74cfb5) 2015
22. Taylor J, Krska J, Mackridge A. A community pharmacy-based cardiovascular screening service: views of service users and the public. *Int J Pharm Pract* 2012;20(5):277-84.
23. McNaughton RJ, Shucksmith J. Reasons for (non)compliance with intervention following identification of 'high-risk' status in the NHS Health Check programme. *Journal of public health (Oxford, England)* 2015;37(2):218-25.
24. Shaw RL, Pattison HM, Holland C, et al. Be SMART: examining the experience of implementing the NHS Health Check in UK primary care. *BMC Fam Pract* 2015;16:1.

**Table 8 Objective 6.1** Are disease detection rates higher for GP practices in areas with high versus low population coverage of the NHS Health Check programme?

| Nº of studies | Study design                       | Risk of bias | Inconsistency            | Indirectness         | Imprecision              | Other considerations | Certainty        | Importance |
|---------------|------------------------------------|--------------|--------------------------|----------------------|--------------------------|----------------------|------------------|------------|
| 3             | observational studies <sup>a</sup> | not serious  | not serious <sup>b</sup> | serious <sup>c</sup> | not serious <sup>d</sup> | none                 | ⊕○○○<br>VERY LOW | CRITICAL   |

- a. Study descriptions were: quasi-experimental study; non-randomised controlled study and an observational study
- b. Palladino (2017) found that high NHS Health Checks program coverage was associated with increased detection of diabetes whereas Lambert (2015) found that increased population coverage of the NHS Health Checks programme was not associated with growth in GP practice disease registers for diabetes. Caley (2014) found no significant associations between % eligible completing an NHS Health Check and change in prevalence of five conditions including diabetes. These variations could reflect ecological effects, attributable to differences in the geographical coverage of each study.
- c. The nature of the intervention group varied between studies. For example, Palladino (2017) compared GP practices with high versus medium or low coverage; Lambert (2016) assessed variation in detection rates in relation to number of health checks performed across practices (therefore no binary intervention and control groups) and Calley (2014) compared practices that offered the intervention with control practices which did not.
- d. One of the studies (Palladino 2017) used data from a large sample and the confidence intervals did not cross the line of no effect.

**References**

1. Palladino R, Vamos E, Chang KCM, et al. Impact of a national diabetes risk assessment and screening programme in England: a quasi-experimental study. *Lancet* 2017;390:S65-S65.

2. Caley M, Chohan P, Hooper J, et al. The impact of NHS Health Checks on the prevalence of disease in general practices: a controlled study. *Br J Gen Pract* 2014;64(625):e516-21.

3. Lambert MF. Assessing potential local routine monitoring indicators of reach for the NHS health checks programme. *Public Health* 2016;131:92-8.

**Table 9 Objective 6.1 Are disease detection rates higher amongst those attending an NHS Health Check following an opportunistic versus standard invitation?**

| <b>Nº of studies</b> | <b>Study design</b>   | <b>Risk of bias</b>      | <b>Inconsistency</b> | <b>Indirectness</b> | <b>Imprecision</b>   | <b>Other considerations</b> | <b>Certainty</b> | <b>Importance</b> |
|----------------------|-----------------------|--------------------------|----------------------|---------------------|----------------------|-----------------------------|------------------|-------------------|
| 1                    | observational studies | not serious <sup>a</sup> | <sup>b</sup>         | not serious         | serious <sup>c</sup> | none                        | -                | CRITICAL          |

a. The study received one low overall rating, however this was in relation to the external rather than internal validity of the study.

b. Not applicable as only one study is included in this GRADE assessment.

c. The sample size was relatively small and the confidence intervals quite wide for >10% CVD risk in this study.

### **References**

Gulliford MC, Khoshaba B, McDermott L, et al. Cardiovascular risk at health checks performed opportunistically or following an invitation letter. Cohort study. Journal of public health (Oxford, England) 2018;40(2):e151-e56.

Table 10 Objective 6.1 Are disease detection rates higher amongst those attending an NHS Health Check versus those who do not attend?

| Nº of studies | Study design                       | Risk of bias             | Inconsistency            | Indirectness | Imprecision              | Other considerations            | Certainty        | Importance            |
|---------------|------------------------------------|--------------------------|--------------------------|--------------|--------------------------|---------------------------------|------------------|-----------------------|
| 4             | observational studies <sup>a</sup> | not serious <sup>b</sup> | not serious <sup>c</sup> | not serious  | not serious <sup>d</sup> | strong association <sup>e</sup> | ⊕⊕⊕○<br>MODERATE | CRITICAL <sup>f</sup> |

- a. One study had a quasi-experimental design, three were cohort studies.
- b. None of the studies received low ratings for domains relevant to internal validity/ risk of bias.
- c. Overall, the intervention was associated with increased disease detection. Rates for individual diagnoses varied across studies however this is likely to reflect differences between samples, as some studies used national data whereas others used data from regions or smaller spatial units.
- d. Some of the studies were small and potentially under powered, however several studies used national data sets and therefore the overall sample size is large. Confidence intervals crossed the line of no effect in some cases however generally, confidence intervals were not large.
- e. Robson (2017) reported the rate of chronic kidney disease diagnosis amongst attendees as 83%.
- f. The purpose of the NHS Health Checks program is to screen for chronic health conditions.

References

1. Kennedy O, Su F, Pears R, Walmsley E, Roderick P. Evaluating the effectiveness of the NHS Health Check programme in South England: a quasi-randomised controlled trial. *BMJ Open*. 2019 Sep 20;9(9):e029420.

2. Robson J, Dostal I, Madurasinghe V, Sheikh A, Hull S, Boomla K, et al. NHS Health Check comorbidity and management: an observational matched study in primary care. *Br J Gen Pract*. 2017 Feb;67(655):e86-e93.

3. Chang KCM, Lee JT, Vamos EP, Soljak M, Johnston D, Khunti K, et al. Impact of the National Health Service Health Check on cardiovascular disease risk: a difference-in-differences matching analysis. *Canadian Medical Association Journal*. Jul;188(10):E228-E38.

4. Forster AS, Dodhia H, Booth H, et al. Estimating the yield of NHS Health Checks in England: A population-based cohort study. *J Public Heal (United Kingdom)* 2015;37:234–40.



Table 11 Objective 6.2 Does NHS Health Check attendance versus non-attendance influence health-related behaviour (smoking status/ prevalence)?

| Nº of studies | Study design                       | Risk of bias         | Inconsistency        | Indirectness | Imprecision                | Other considerations | Certainty        | Importance |
|---------------|------------------------------------|----------------------|----------------------|--------------|----------------------------|----------------------|------------------|------------|
| 5             | observational studies <sup>a</sup> | serious <sup>b</sup> | serious <sup>c</sup> | not serious  | Not estimable <sup>d</sup> | none                 | ⊕○○○<br>VERY LOW | IMPORTANT  |

- a. One randomised study and four observational studies.
- b. Mode of collection of smoking data wasn't consistently reported, however it is likely to have been self-report and entered into routine medical records which relies on patients both attending the general practice and being asked about their smoking status within that time. Issues associated with self-report data and completeness could introduce biases in relation to the outcome measurement.
- c. Although point estimates indicated a reduction in smoking across studies, there were inconsistencies regarding the statistical significance of these effects between studies.
- d. Imprecision is not estimable due to differences in effect calculations between studies.

References

1. Chang KC, Lee JT, Vamos EP, et al. Impact of the National Health Service Health Check on cardiovascular disease risk: a difference-in-differences matching analysis. *CMAJ* 2016;188(10):E228-E38.
2. Forster AS, Dodhia H, Booth H, et al. Estimating the yield of NHS Health Checks in England: a population-based cohort study. *Journal of public health (Oxford, England)* 2015;37(2):234-40.
3. Alageel S, Gulliford MC. Health checks and cardiovascular risk factor values over six years' follow-up: Matched cohort study using electronic health records in England. *PLoS Med* 2019;16(7):e1002863.
4. Cochrane T, Davey R, Iqbal Z, et al. NHS health checks through general practice: randomised trial of population cardiovascular risk reduction. *BMC Public Health* 2012;12(1):944.
5. Artac M, Dalton AR, Majeed A, Car J, Huckvale K, Millett C. Uptake of the NHS Health Check programme in an urban setting. *Family practice*. 2013 Aug 1;30(4):426-35.

Table 12 Objective 6.3 What proportions of NHS Health check attendees receive risk management advice or referrals?

| Nº of studies | Study design                       | Risk of bias         | Inconsistency        | Indirectness | Imprecision              | Other considerations | Certainty        | Importance |
|---------------|------------------------------------|----------------------|----------------------|--------------|--------------------------|----------------------|------------------|------------|
| 11            | observational studies <sup>a</sup> | serious <sup>b</sup> | serious <sup>c</sup> | not serious  | not serious <sup>d</sup> | none                 | ⊕○○○<br>VERY LOW | IMPORTANT  |

- a. One quasi-randomised controlled trial(Kennedy *et al* 2019)<sup>97</sup>; the remaining studies had an observational design.
- b. Two studies (Krska *et al* 2015<sup>23</sup> and Baker *et al* 2015<sup>17</sup>) were rated low on confounding; one study (Foster 2015<sup>13</sup>) was rated low on outcome measurement. These are issues relevant to the internal validity of a study.
- c. Large variations existed in the proportions of patients being referred to lifestyle services between studies. This heterogeneity is likely reflective of geographical variations in referrals.
- d. The eleven studies which reported relevant data to address the research question were mixed in their coverage; some used national datasets with large sample sizes other studies used regional data. Overall however, the sample size was large. Confidence intervals were not presented for several studies and it is likely that the confidence intervals were large for the regional studies, however in several of the larger studies for which CIs were presented, these were narrow.

References

1. Krska J, du Plessis R, Chellaswamy H. Implementation of NHS Health Checks in general practice: variation in delivery between practices and practitioners. Prim Health Care Res Dev 2015;1–8
2. Robson J, Dostal I, Sheikh A, et al. The NHS Health Check in England: an evaluation of the first 4 years. BMJ Open 2016;6(1):e008840.
3. Cochrane T, Gidlow CJ, Kumar J, et al. Cross-sectional review of the response and treatment uptake from the NHS Health Checks programme in Stoke on Trent. J Public Heal (United Kingdom) 2013;35:92–8.
4. Forster 2015
5. Robson J, Dostal I, Madurasinghe V, et al. The NHS Health Check programme: implementation in east London 2009-2011. BMJ Open 2015;5(4):e007578.
6. Baker C, Loughren EA, Crone D, et al. Perceptions of health professionals involved in a NHS Health Check care pathway. Pract Nurs 2015;26:608–12.
7. Coffey M, Cooper AM, Brown TM, et al. Vascular Health Checks in Salford: An exploration using FARSITE data. 2014.
8. Alageel S, Wright A, Gulliford M. Impact of the Health Check programme on the provision of smoking cessation interventions in England. European Journal of Public Health. 2017;27(suppl\_3).
9. Alageel S, Gulliford MC. Health checks and cardiovascular risk factor values over six years' follow-up: Matched cohort study using electronic health records in England. PLoS Med 2019;16(7):e1002863.
10. Coghill N. Improving the uptake of NHS Health Checks in more deprived communities using ‘ outreach ’ telephone calls made by specialist health advocates from the same communities : A quantitative service evaluation. 2016.

11. Kennedy O, Su F, Pears R, Walmsley E, Roderick P. Evaluating the effectiveness of the NHS Health Check programme in South England: a quasi-randomised controlled trial. *BMJ Open*. 2019 Sep 20;9(9):e029420.

**Table 13 Objective 6.4 Does the NHS Health Check versus no NHS Health Check reduce cardiovascular disease risk?**

| <b>Nº of studies</b> | <b>Study design</b>                | <b>Risk of bias</b>  | <b>Inconsistency</b>     | <b>Indirectness</b> | <b>Imprecision</b>       | <b>Other considerations</b> | <b>Certainty</b> | <b>Importance</b> |
|----------------------|------------------------------------|----------------------|--------------------------|---------------------|--------------------------|-----------------------------|------------------|-------------------|
| 5 <sup>a</sup>       | observational studies <sup>b</sup> | serious <sup>c</sup> | not serious <sup>d</sup> | not serious         | not serious <sup>e</sup> | none                        | ⊕○○○<br>VERY LOW | CRITICAL          |

a. One study was a randomized trial, the other four were observational studies.

b. One study had a domain with a low rating - Forster (2015), for outcome measurement. This could affect the internal validity for assessment of the association between NHS Health Checks and CVD risk. Although the other four studies studies were rated as medium or high for this domain, the study by Forster (2015) was the largest study in the analysis and could have impacted significantly on the overall results.

c. Results were generally consistent across studies

d. Decision based on confidence intervals which were reasonably narrow and did not cross the line of no effect. Also, only one of the studies did not use a national data set with a large sample size.

e. Decision based on confidence intervals which were reasonably narrow and die not cross the line of no effect. Also, three of the studies used national data sets with a large sample size.

## **References**

1. Artac M, Dalton ARH, Majeed A, et al. Effectiveness of a national cardiovascular disease risk assessment program (NHS Health Check): results after one year. *Prev Med (Baltim)* 2013;57:129–34
2. Cochrane T, Davey R, Iqbal Z, et al. NHS health checks through general practice: randomised trial of population cardiovascular risk reduction. *BMC Public Health* 127 2012;12:944.
3. Forster AS, Burgess C, Dodhia H, et al. Do health checks improve risk factor detection in primary care? Matched cohort study using electronic health records. *J Public Health(Bangkok)* 2015;:1–8.
4. Chang K, Lee J, Vamos E, et al. Impact of the National Health Service Health Check. *CMAJ* 2016;188:E228-238.
5. Alageel S, Gulliford MC. Health checks and cardiovascular risk factor values over six years' follow-up: Matched cohort study using electronic health records in England. *Plos Medicine.* Jul;16(7):16.

Table 14. Objective 6.5 Does the NHS Health Check versus no NHS Health Check increase prescribing of statins or antihypertensive medication?

| № of studies | Study design                       | Risk of bias             | Inconsistency            | Indirectness | Imprecision              | Other considerations | Certainty   | Importance |
|--------------|------------------------------------|--------------------------|--------------------------|--------------|--------------------------|----------------------|-------------|------------|
| 16           | observational studies <sup>a</sup> | not serious <sup>b</sup> | not serious <sup>c</sup> | not serious  | not serious <sup>d</sup> | none                 | ⊕⊕○○<br>LOW | IMPORTANT  |

- a. One study was a randomised trial, the remaining 15 had an observational design
- b. The only study that received a low rating for a domain relevant to risk of bias was Krska 2016 which scored low for confounding. As other studies scored medium or high on this domain, it was deemed that risk of bias overall wouldn't be significantly affected.
- c. Most studies show an increase in prescribing following the NHS Health Check. The exception is Alageel 2019 in relation to prescribing of anti-hypertensive medication.
- d. Although variations in effect estimates are present between studies, this heterogeneity may be attributable to factors including different sample sizes and differences in study designs. The confidence intervals reported appear reasonably small and do not cross the line of no effect.

References

1. Alageel S, Gulliford MC. Health checks and cardiovascular risk factor values over six years' follow-up: Matched cohort study using electronic health records in England. PLoS Med 2019;16(7):e1002863.
2. Chang K, Lee J, Vamos E, et al. Impact of the National Health Service Health Check. CMAJ 2016;188:E228-238.
3. Coghill N, Garside L, Montgomery AA, et al. NHS health checks: a cross- sectional observational study on equity of uptake and outcomes. BMC health services research 2018;18(1):238.
4. Forster AS, Burgess C, Dodhia H, et al. Do health checks improve risk factor detection in primary care? Matched cohort study using electronic health records. Journal of Public Health 2015;38(3):552-59.
5. Jamet G, Tubeuf S, Meads D. Leeds Institute of Health Sciences Has the introduction of NHS health checks increased the prescription of statins for CVD prevention? 2014.
6. Robson J, Dostal I, Madurasinghe V, et al. NHS Health Check comorbidity and management : an observational matched study in primary care. Br J Gen Pract Published Online First: 2016.
7. Artac M, Dalton ARH, Majeed A, et al. Effectiveness of a national cardiovascular disease risk assessment program (NHS Health Check): results after one year. Prev Med (Baltim) 2013;57:129–34.
8. Chang KC-M, Soljak M, Lee JT, et al. Coverage of a national cardiovascular risk assessment and management programme (NHS Health Check): Retrospective database study. Prev Med (Baltim) 2015;78:1–8.

9. Dalton AR, Bottle A, Okoro C, et al. Uptake of the NHS Health Checks programme in a deprived, culturally diverse setting: cross-sectional study. *Journal of public health (Oxford, England)* 2011;33(3):422-9.
10. Forster AS, Dodhia H, Booth H, et al. Estimating the yield of NHS Health Checks in England: A population-based cohort study. *J Public Heal (United Kingdom)* 2015;37:234–40
11. Kennedy O, Su F, Pears R, Walmsley E, Roderick P. Evaluating the effectiveness of the NHS Health Check programme in South England: a quasi-randomised controlled trial. *BMJ Open*. 2019 Sep 20;9(9):e029420.
12. Krska J, du Plessis R, Chellaswamy H. Implementation of NHS Health Checks in general practice: variation in delivery between practices and practitioners. *Prim Health Care Res Dev* 2016;17(4):385-92.
13. Robson J, Dostal I, Madurasinghe V, et al. NHS Health Check comorbidity and management: an observational matched study in primary care. *Br J Gen Pract* 2017;67(655):e86-e93.
14. Carter P, Bodicoat DH, Davies MJ, et al. A retrospective evaluation of the NHS Health Check Programme in a multi-ethnic population. *J Public Health (Bangkok)* 2015;38:fdv115.
15. Cochrane T, Gidlow CJ, Kumar J, et al. Cross-sectional review of the response and treatment uptake from the NHS Health Checks programme in Stoke on Trent. *Journal of public health (Oxford, England)* 2013;35(1):92-8.
16. Coffey M, Cooper AM, Brown TM. *Vascular Health Checks in Salford: An Exploration Using FARSITE Data, Commissioned by Salford City Council* 2014
